# Supplementary material for: Gene Augmentation Therapy for a Missense Substitution in the cGMP-Binding Domain of Ovine CNGA3 Gene Restores Vision in Day-Blind Sheep
Source: PubMed Central journal article supplement — Invest Ophthalmol Vis Sci. 2017 Mar;58(3):1577–84. doi: 10.1167/iovs.16-20986 (PMC5361581; doi:10.1167/iovs.16-20986), 2017-03
Supplement: iovs-58-03-16_s01.pdf [file iovs-58-03-16_s01.pdf]

**Table S1 .** Primer Sequences used to amplify oCNGA3 gene regions

| Target          | Primer Name | 5'-3' Primer Sequence | Amplicon Size (bp) |
|-----------------|-------------|-----------------------|--------------------|
| Exon 8 mutation | oaCNGA3ex8F | GTTTCGATGAGCTCCAGTCC  | 252                |
|                 | oaCNGA3in8R | CCTGGCTCTTCTGACTGTCC  |                    |
| Exon 9 mutation | oaCNGA3ex9F | GGTCCGAATCTTCCAGGACT  | 300                |
|                 | oaCNGA3ex9R | AGGCAGAACAGGTCCGAGTA  |                    |

Abbreviations: F, forward; R, reverse

The annealing temperature was 65°C to 58°C.
