# Supplementary material for: Gene Augmentation Therapy for a Missense Substitution in the cGMP-Binding Domain of Ovine CNGA3 Gene Restores Vision in Day-Blind Sheep
Source: PubMed Central journal article supplement — Invest Ophthalmol Vis Sci. 2017 Mar;58(3):1577–84. doi: 10.1167/iovs.16-20986 (PMC5361581; doi:10.1167/iovs.16-20986), 2017-03

**Fig. S5.**

Chromatograms following sequencing at the c. G1618T, SNP.

A. Non affected homozygous; B. non affected heterozygous; C. Homozygous day-blind.

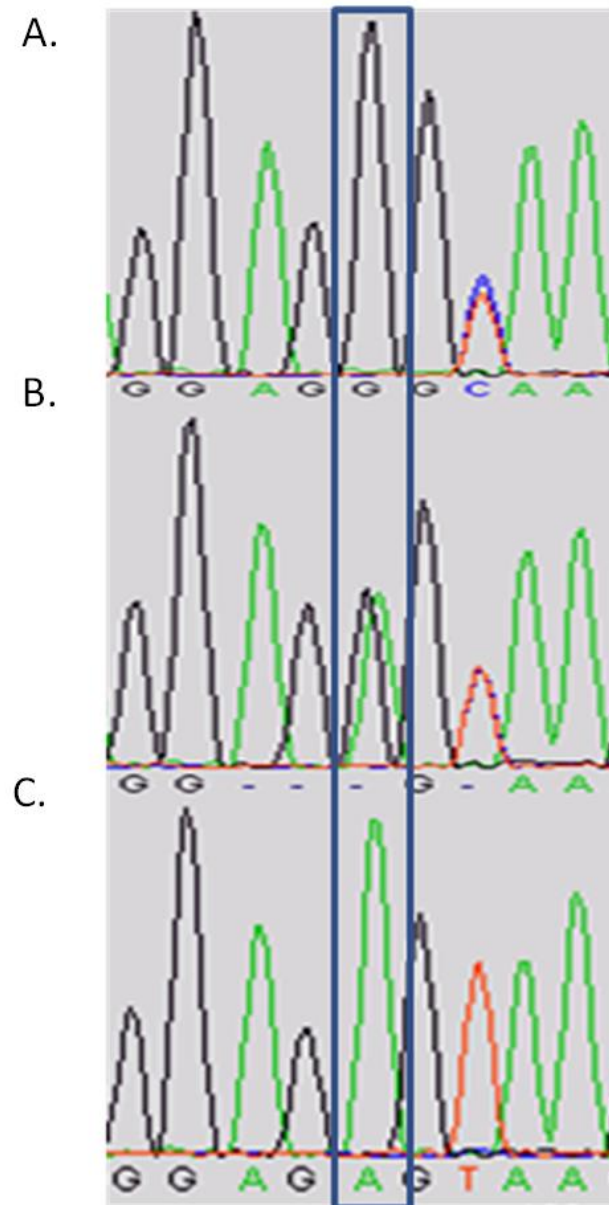

Supplement: iovs-58-03-16_s07.pdf [file iovs-58-03-16_s07.pdf]
